# Supplementary material
Source: PubMed Central journal article supplement (PMC3267962)
Supplement: Supp_Data.pdf [file Supp_Data.pdf]

## Supplementary Data

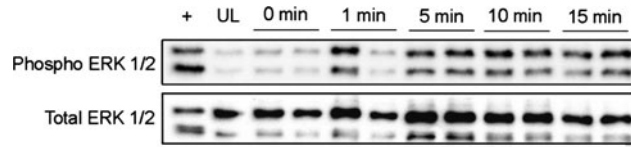

**SUPPLEMENTARY FIG. S1.** Effect of stretch duration on ERK1/2 phosphorylation. Representative western blots showing the phosphorylation of ERK1/2 following stretch (Single) of 1, 5, 10, and 15 min. Maximal ERK1/2 phosphorylation was reached after 10 min.

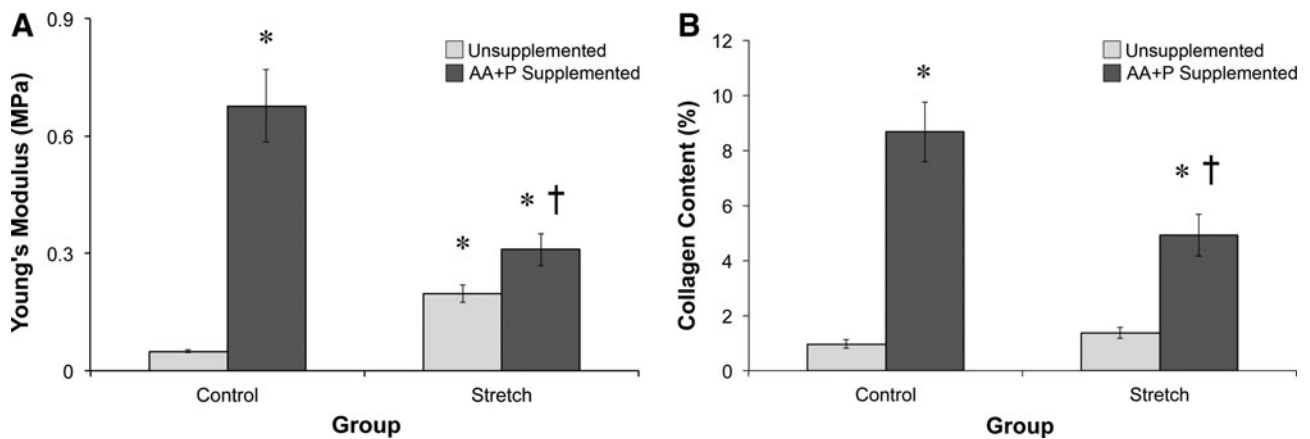

**SUPPLEMENTARY FIG. S2.** Effect of 5 days of 10% stretch on (A) Young's modulus and (B) collagen concentration. CTF constructs subjected to a 10% strain at a frequency of 1 Hz continuously for 5 days. The light bars are unsupplemented, whereas the dark bars are supplemented with 50  $\mu$ M ascorbic acid + proline (AA + P). \*Significantly different than the control; †significantly different than the unstretched AA + P group. Results are representative of two independent trials and presented as mean  $\pm$  SEM of  $n=7$  for all groups.
